# Supplementary material for: Artificial Intelligence and Computer Vision in Low Back Pain: A Systematic Review
Source: MDPI journal article supplement (doi:10.3390/ijerph182010909), 2021-10-17
Supplement: s1 [file s1]

Table S1: Summary of the methodological quality of included studies regarding the 4 domains assessing the **risk of bias** of the QUADAS-2 score.

| Article              | Patient selection | Index test | Reference standard | Flow and timing |
|----------------------|-------------------|------------|--------------------|-----------------|
| Adankon, 2012        | Unclear           | Low        | Low                | Low             |
| Castro-Mateos, 2014  | High              | Low        | Low                | High            |
| Raudner, 2020        | Low               | Low        | Low                | Low             |
| Abdollah, 2020       | High              | Low        | Low                | Low             |
| Yang, 2020           | Low               | Low        | Low                | Low             |
| Ruiz-España, 2015    | Low               | Low        | Low                | Low             |
| Ketola, 2020         | High              | Low        | Unclear            | Low             |
| Garcia-Cano, 2018    | High              | Low        | Low                | High            |
| Haq, 2015            | Low               | Low        | Low                | Low             |
| Neubert, 2012        | Unclear           | Low        | Low                | Low             |
| Haq, 2020            | Low               | Low        | Low                | Low             |
| Li, 2018             | Low               | Low        | Low                | Low             |
| Ibragimov, 2017      | High              | Low        | Low                | Low             |
| Yu, 2018             | Unclear           | Low        | Low                | Low             |
| Korez, 2015          | Unclear           | Low        | Low                | Low             |
| Al-Helo, 2011        | High              | Low        | Low                | Low             |
| Huang, 2013          | Low               | Low        | Low                | Low             |
| Mahdy, 2018          | Low               | Low        | Low                | Low             |
| Courbot, 2016        | Low               | Low        | Low                | Low             |
| Rasoulilian, 2013    | Unclear           | Low        | Low                | Low             |
| Mastmeyer, 2006      | Unclear           | Low        | Low                | Low             |
| Jimenez-Pastor, 2020 | Low               | Low        | Low                | Low             |
| Lee, 2011            | Unclear           | Low        | Low                | Low             |
| Klinder, 2009        | High              | Low        | Low                | High            |
| Štern, 2009          | Unclear           | Low        | Low                | Low             |
| Wong, 2008           | Unclear           | Low        | Low                | Low             |
| Zheng, 2011          | High              | Unclear    | Low                | Low             |
| Zheng, 2004          | Unclear           | Low        | High               | Low             |
| Michopoulou, 2009    | Unclear           | Low        | Low                | Low             |
| Fallah, 2018         | High              | Low        | Low                | Low             |
| Ghosh, 2014          | Low               | Low        | Low                | Low             |
| Kim, 2018            | Low               | Low        | Low                | Low             |
| Gaonkar, 2017        | Unclear           | Low        | Low                | High            |
| Gawel, 2018          | Unclear           | Low        | Low                | Low             |
| Engstrom, 2011       | Low               | Low        | Low                | Low             |
| Baum, 2018           | Unclear           | Low        | Low                | Low             |
| Jurcak, 2008         | Unclear           | Low        | Low                | Low             |
| Fortin, 2017         | Low               | Low        | Low                | Low             |
| Neubert, 2013        | High              | Low        | Low                | High            |
| Oktay, 2011          | Unclear           | Low        | Low                | Low             |
| Castro-Mateos, 2016  | Unclear           | Low        | Low                | Low             |
| Kim, 2020            | Unclear           | Low        | High               | Low             |
| Lui, 2014            | Unclear           | Low        | High               | Low             |
| Ribeiro, 2010        | Unclear           | Low        | Low                | Low             |
| Sa, 2016             | Unclear           | Low        | Low                | Low             |
| Iriondo, 2020        | Unclear           | Low        | Low                | High            |
| Staartjes, 2021      | High              | Low        | Low                | Low             |
| Lee, 2020            | Unclear           | Low        | Low                | Low             |
| Fan, 2020            | Low               | Low        | Low                | Low             |
| Malinda, 2020        | Unclear           | Low        | Low                | Low             |
| Siemionow, 2020      | Unclear           | Low        | Unclear            | Unclear         |
| Netherton, 2020      | High              | Low        | Low                | High            |
| Watanabe, 2019       | Low               | Low        | Low                | Low             |
| Kim, 2018            | Low               | Low        | Low                | Low             |
| Shen, 2021           | Low               | Low        | Low                | Low             |
| Gaonkar, 2019        | Unclear           | Low        | Low                | Low             |
| Huang, 2020          | Low               | Low        | Low                | Low             |
| Li, 2021             | Unclear           | Low        | Low                | Low             |
| Li, 2019             | Unclear           | Low        | Low                | Low             |
| Zhou, 2020           | Low               | Low        | Low                | Low             |
| Jamaludin, 2017      | Low               | Low        | Low                | High            |
| Natalia, 2020        | Unclear           | Low        | Low                | Low             |
| Zhou, 2019           | Unclear           | Low        | Low                | Unclear         |
| Forsberg, 2017       | Unclear           | Low        | Low                | Low             |
| Baka, 2017           | High              | Low        | Low                | High            |
| Cho, 2020            | High              | Low        | Low                | Low             |
| Li, 2016             | Unclear           | Low        | Low                | High            |
| Sa, 2017             | Unclear           | Low        | Low                | Low             |

Table S2: Summary of the methodological quality of included studies regarding the 3 domains assessing **applicability** concerns of the QUADAS-2 score.

| Article              | Patient selection | Index test | Reference standard |
|----------------------|-------------------|------------|--------------------|
| Adankon, 2012        | Low               | Low        | Low                |
| Castro-Mateos, 2014  | Low               | Low        | Low                |
| Raudner, 2020        | Low               | Low        | Low                |
| Abdollah, 2020       | Low               | Low        | Low                |
| Yang, 2020           | Low               | Low        | Low                |
| Ruiz-España, 2015    | Low               | Low        | Low                |
| Ketola, 2020         | High              | Low        | Low                |
| Garcia-Cano, 2018    | High              | Low        | Low                |
| Haq, 2015            | Low               | Low        | Low                |
| Neubert, 2012        | Low               | Low        | Low                |
| Haq, 2020            | Low               | Low        | Low                |
| Li, 2018             | Low               | Low        | Low                |
| Ibragimov, 2017      | High              | Low        | Low                |
| Yu, 2018             | Low               | Low        | Low                |
| Korez, 2015          | Low               | Low        | Low                |
| Al-Helo, 2011        | High              | Low        | Low                |
| Huang, 2013          | Low               | Low        | Low                |
| Mahdy, 2018          | High              | Low        | Low                |
| Courbot, 2016        | High              | Low        | Low                |
| Rasoulilian, 2013    | Unclear           | Low        | Low                |
| Mastmeyer, 2006      | Unclear           | Low        | Low                |
| Jimenez-Pastor, 2020 | High              | Low        | Low                |
| Lee, 2011            | Unclear           | Low        | Low                |
| Klinder, 2009        | High              | Low        | Low                |
| Štern, 2009          | Unclear           | Low        | Low                |
| Wong, 2008           | Unclear           | Low        | Low                |
| Zheng, 2011          | High              | Low        | Low                |
| Zheng, 2004          | Unclear           | Low        | High               |
| Michopoulou, 2009    | Unclear           | Low        | Low                |
| Fallah, 2018         | High              | Low        | Low                |
| Ghosh, 2014          | Unclear           | Low        | Low                |
| Kim, 2018            | High              | Low        | Low                |
| Gaonkar, 2017        | Unclear           | Low        | Low                |
| Gawel, 2018          | Low               | Low        | Low                |
| Engstrom, 2011       | High              | Low        | Low                |
| Baum, 2018           | High              | Low        | Low                |
| Jurcak, 2008         | High              | Low        | Low                |
| Fortin, 2017         | Low               | Low        | Low                |
| Neubert, 2013        | High              | Low        | Low                |
| Oktay, 2011          | Low               | Low        | Low                |
| Castro-Mateos, 2016  | Low               | Low        | Low                |
| Kim, 2020            | Unclear           | Low        | High               |
| Lui, 2014            | Unclear           | Low        | High               |
| Ribeiro, 2010        | High              | Low        | Low                |
| Sa, 2016             | Unclear           | Low        | Low                |
| Iriondo, 2020        | High              | Low        | Low                |
| Staartjes, 2021      | Unclear           | Low        | Low                |
| Lee, 2020            | Low               | Low        | Low                |
| Fan, 2020            | High              | Low        | Low                |
| Malinda, 2020        | Unclear           | Low        | Low                |
| Siemionow, 2020      | Unclear           | Low        | Unclear            |
| Netherton, 2020      | High              | Low        | Low                |
| Watanabe, 2019       | High              | Low        | Low                |
| Kim, 2018            | Low               | Low        | Low                |
| Shen, 2021           | Low               | Low        | Low                |
| Gaonkar, 2019        | Unclear           | Low        | Low                |
| Huang, 2020          | Low               | Low        | Low                |
| Li, 2021             | Low               | Low        | Low                |
| Li, 2019             | Low               | Low        | Low                |
| Zhou, 2020           | Low               | Low        | Low                |
| Jamaludin, 2017      | Low               | Low        | Low                |
| Natalia, 2020        | Low               | Low        | Low                |
| Zhou, 2019           | Unclear           | Low        | Low                |
| Forsberg, 2017       | Unclear           | Low        | Low                |
| Baka, 2017           | High              | Low        | Low                |
| Cho, 2020            | Low               | Low        | Low                |
| Li, 2016             | Unclear           | Low        | Unclear            |
| Sa, 2017             | Unclear           | Low        | Unclear            |
